# Supplementary material for: Effective removal of Cr(vi) from aqueous solution by biochar supported manganese sulfide
Source: Royal Society of Chemistry journal article supplement (doi:10.1039/c9ra06028f), 2019-01-01
Supplement: c9ra06028f1.pdf [file c9ra06028f1.pdf]

### Data analysis

The initial adsorption rate ( $h$ ) equation was as follows.

$$h = k_2 q_e^2$$

The normalized standard deviation (NSD) and average relative error (ARE), indicating the validity of kinetic models, are defined as:

$$NSD = 100 \sqrt{\frac{1}{N-1} \sum_{i=1}^N \left[ \frac{(q_{ti}^{exp} - q_{ti}^{cal})}{q_{ti}^{exp}} \right]^2}$$
$$ARE = \frac{100}{N} \sum_{i=1}^N \left| \frac{(q_{ti}^{exp} - q_{ti}^{cal})}{q_{ti}^{exp}} \right|$$

where  $q_{ti}^{exp}$  and  $q_{ti}^{cal}$  (mg/g) are experimental and calculated Cr(VI) adsorbed on MnS@biochar at time  $t$  and  $N$  is the number of measurements made. The smaller NSD and ARE values reveal more accurate estimation of  $q_t$  values. The governing equations of the three models are integrated by applying the boundary conditions  $q = 0$  at  $t = 0$

The Marquardt's percent standard deviation (MPSD) and the hybrid error function (HYBRID) indicated the validity of adsorption isotherm:

$$MPSD = 100 \sqrt{\frac{1}{N-P} \sum_{i=1}^N \left( \frac{q_{ei}^{exp} - q_{ei}^{cal}}{q_{ei}^{exp}} \right)^2}$$
$$HYBRID = \frac{100}{N-P} \sum_{i=1}^N \left| \frac{(q_{ei}^{exp} - q_{ei}^{cal})^2}{q_{ei}^{exp}} \right|$$

where  $q_{ei}^{exp}$  is the data from the batch experiment  $i$  (mg/g),  $q_{ei}^{cal}$  is the estimated value from the isotherm for corresponding  $q_{ei}^{exp}$  (mg/g),  $N$  is the number of observations in experimental isotherm, and  $P$  is the number of parameters in regression model. The smaller MPSD and HYBRID values indicate more accurate estimation of  $q_e$  values.

### Figures

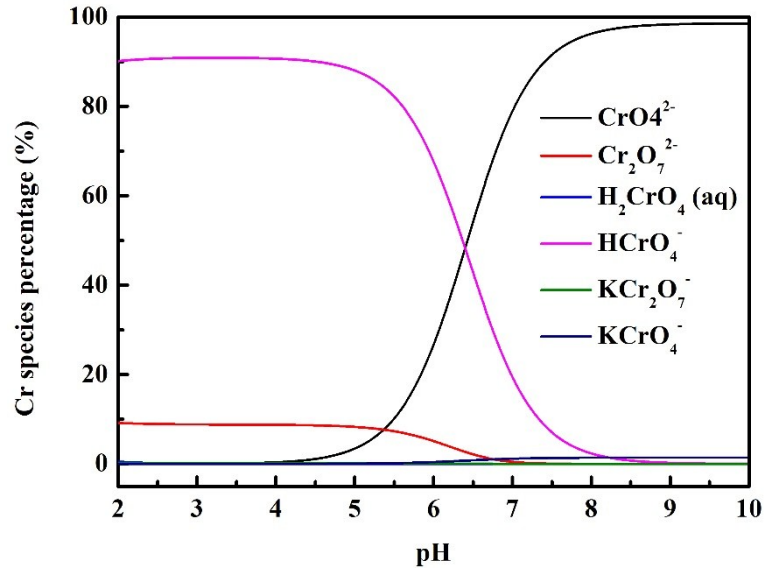

Fig. S1 Cr species percentage as the function of pH (Condition:  $C_{Cr(VI)}=150$  mg/L)

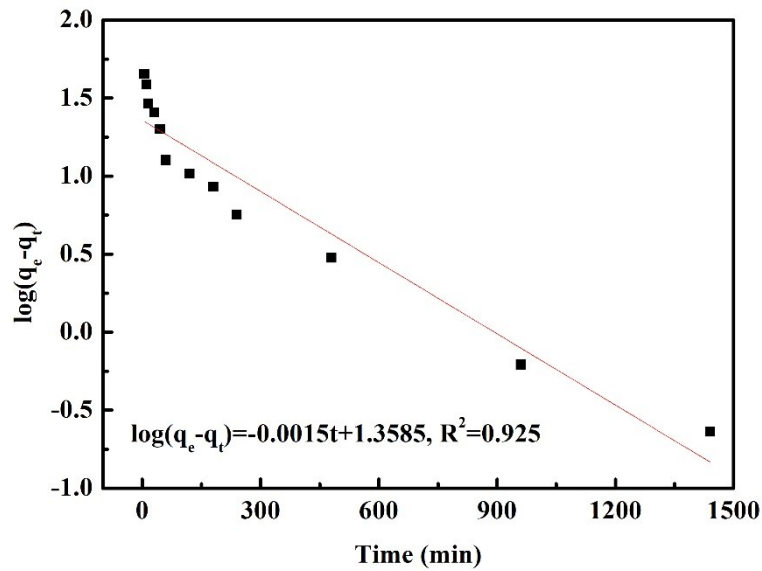

Fig. S2 The pseudo first-order kinetic model fitting line

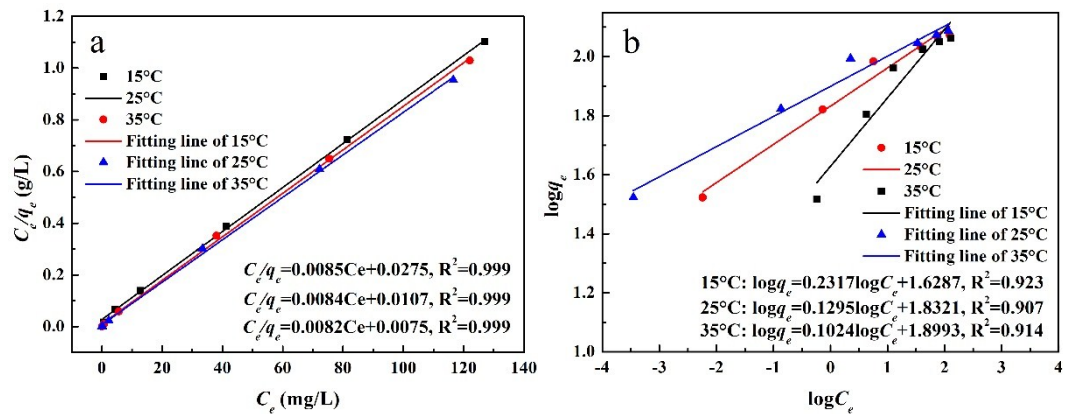

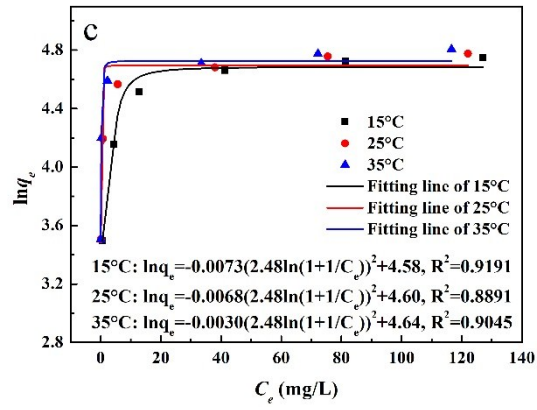

Figure S3 The fitting results of adsorption isotherms models (a: Langmuir model, b: Freundlich model, c: Dubinin-Radushkuvich model)

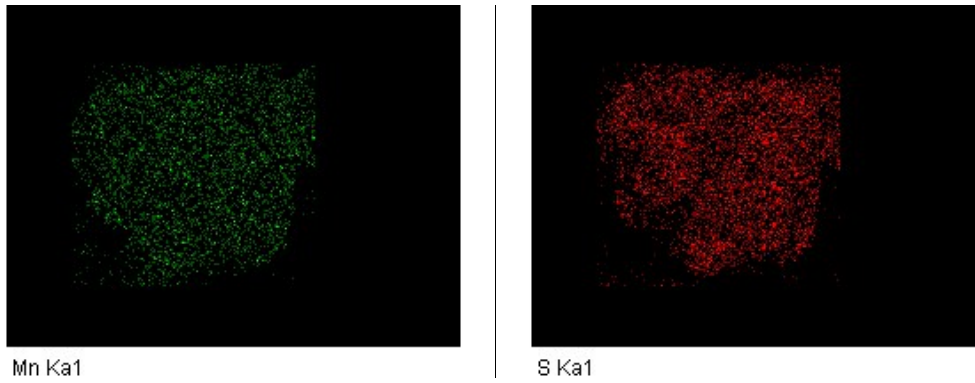

Figure S4 EDS analysis of F-MnS@biochar

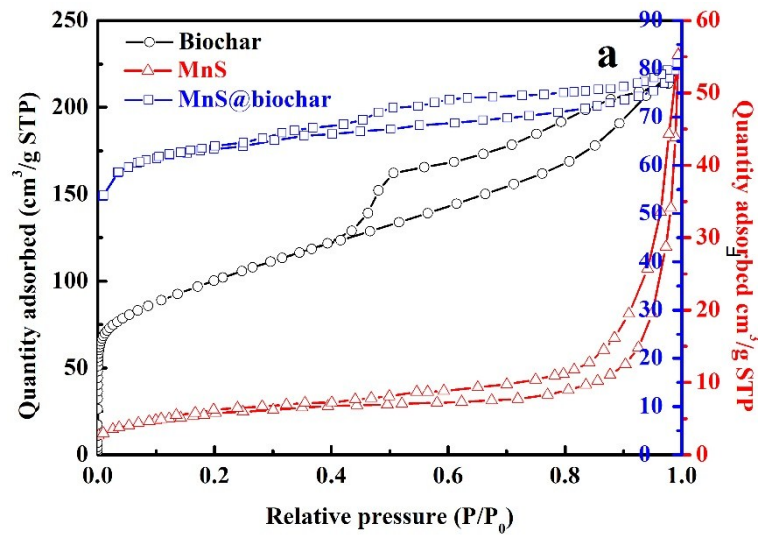

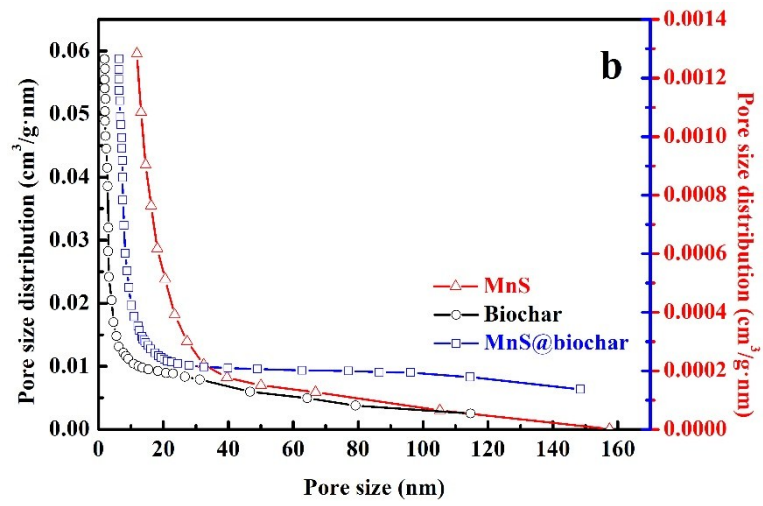

Fig. S5 The specific surface areas (a) and porous structures (b) of MnS, biochar, and

F-MnS@biochar

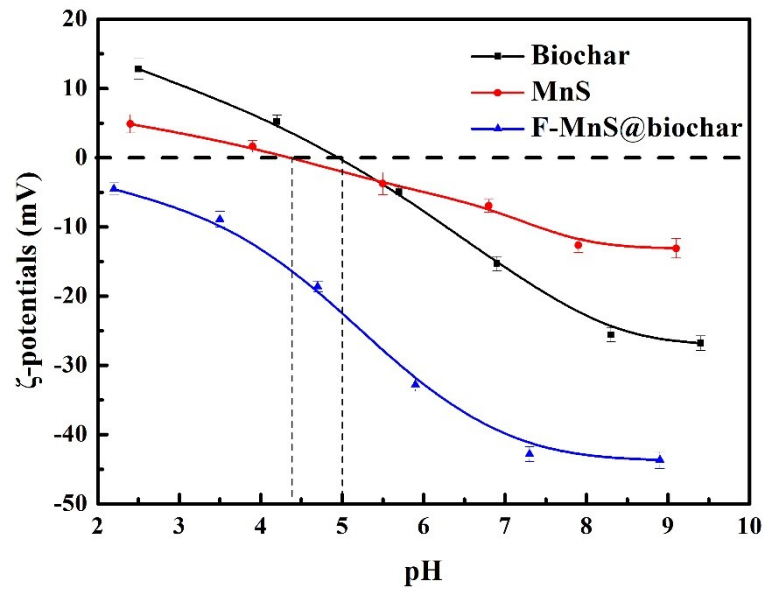

Fig. S6  $\zeta$ -potentials of biochar, MnS, and F-MnS@biochar

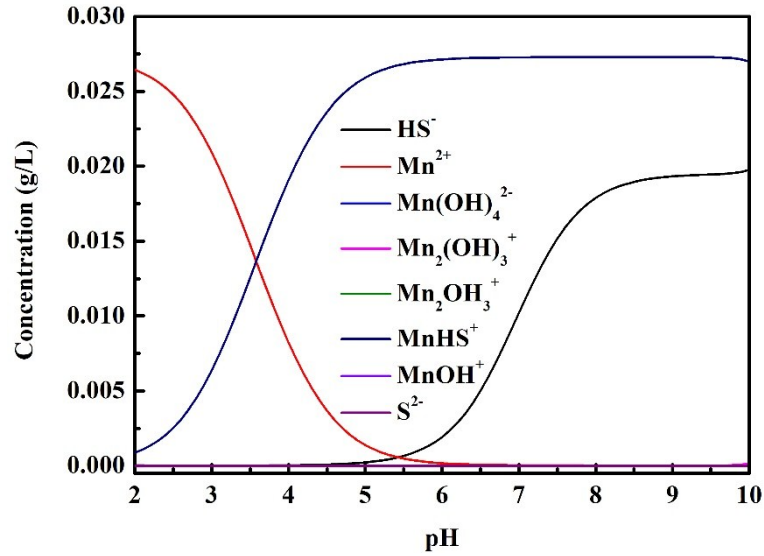

**Fig. S7** MnS hydrolysis as the function of pH (Condition:  $C_{\text{MnS}}=1.5$  g/L)

## Tables

**Table S1** The fitting parameters of pseudo first-order model and pseudo second-order model used for simulating Cr(VI) adsorption kinetic data

| Model | $k_1/k_2$ | $q_e$ | $h_1/h_2$ | $R^2$ | NSD  | ARE  |
|-------|-----------|-------|-----------|-------|------|------|
| PFO   | 0.0035    | 22.83 | 0.08      | 0.925 | 62.1 | 55.3 |
| PSO   | 0.0306    | 98.04 | 9.02      | 0.999 | 11.6 | 8.7  |

**Table S2** The Cr(VI) removal amounts of different biochar materials

| Material                                                                   | $Q_e$                    | Ref. |
|----------------------------------------------------------------------------|--------------------------|------|
| CMC-FeS@biochar                                                            | 130.5 mg/g               | 1    |
| ZVI-biochar                                                                | 17.8 mg/g                | 2    |
| Fe-biochar                                                                 | 67.44 mg/g               | 3    |
| $\beta$ -FeOOH/SYBK                                                        | 37.04 g kg <sup>-1</sup> | 4    |
| Fe <sub>3</sub> O <sub>4</sub> @SiO <sub>2</sub> -NH <sub>2</sub> -biochar | 27.2 mg/g                | 5    |
| Fe <sub>3</sub> O <sub>4</sub> @biochar                                    | 25.27 mg/g               | 6    |

**Table S3** Regression parameters of adsorption isotherm data of Cr(VI) onto MnS@biochar by Langmuir, Freundlich, Redlich-Peterson, and Dubinin-Radushkevich models

| Temperature | Model                | Parameters                                            | MPSD  | HYBRID |
|-------------|----------------------|-------------------------------------------------------|-------|--------|
| 15° C       | Langmuir             | $q_m=117.65; b=0.3091; R^2=0.999$                     | 9.51  | 4.88   |
|             | Freundlich           | $n=4.3159; k_2=42.53; R^2=0.923$                      | 44.75 | 21.91  |
|             | Redlich-Peterson     | $K_R=93.34; \alpha = 1.27; \beta= 0.9083; R^2=0.977$  | 4.86  | 1.48   |
|             | Dubinin-Radushkevich | $q_m = 97.51 \text{ mg/g}; K_D = 0.0073; E= 8.28$     | 38.95 | 17.24  |
| 25° C       | Langmuir             | $q_m=119.05; b=0.7850; R^2=0.999$                     | 17.35 | 3.26   |
|             | Freundlich           | $n=7.7220; k_2=67.94; R^2=0.907$                      | 38.26 | 18.73  |
|             | Redlich-Peterson     | $K_R=23178; \alpha = 310; \beta= 0.8985; R^2=0.982$   | 3.17  | 0.63   |
|             | Dubinin-Radushkevich | $q_m = 99.48 \text{ mg/g}; K_D = 0.0068; E= 8.57$     | 42.33 | 15.45  |
| 35° C       | Langmuir             | $q_m=121.95; b=1.0933; R^2=0.99109$                   | 14.02 | 5.23   |
|             | Freundlich           | $n=9.7656; k_2=79.30; R^2=0.914$                      | 40.55 | 19.28  |
|             | Redlich-Peterson     | $K_R=362792; \alpha = 4280; \beta= 0.9207; R^2=0.981$ | 5.42  | 2.19   |
|             | Dubinin-Radushkevich | $q_m = 103.54 \text{ mg/g}; K_D = 0.0030; E= 12.91$   | 40.59 | 16.23  |

**Table S4** XPS results of F-MnS@biochar, and R-MnS@biochar (%)

| Samples       | O1s    |         |        |      | S2p                            |                                |         |
|---------------|--------|---------|--------|------|--------------------------------|--------------------------------|---------|
|               | C-O    | -OH     | C=O    | M=O  | S(VI)/S(IV)                    | S(-II)*                        | S(-II)# |
| F-MnS@biochar | 22.3   | 60.8    | 16.9   | -    | 7.6                            | 12.8                           | 79.6    |
| R-MnS@biochar | -      | 42.7    | 35.6   | 21.7 | 15.3                           | 11.9                           | 72.8    |
| Samples       | Mn2p   |         |        |      | Cr2p                           |                                |         |
|               | Mn(II) | Mn(III) | Mn(IV) | Me=O | Cr <sub>2</sub> O <sub>3</sub> | Cr <sub>2</sub> S <sub>3</sub> | Cr(VI)  |
| F-MnS@biochar | 91.6   | -       | 8.4    | -    | -                              | -                              | -       |
| R-MnS@biochar | 62.8   | 29.7    | 7.5    | 21.7 | 24.5                           | 42.8                           | 32.7    |

### References:

1. Lyu H, Tang J, Huang Y, et al. Removal of hexavalent chromium from aqueous solutions by a novel biochar supported nanoscale iron sulfide composite, *Chemical Engineering Journal*, 2017, 322:516-524.
2. Dong H, Deng J, Xie Y, et al. Stabilization of nanoscale zero-valent iron (nZVI) with modified biochar for Cr(VI) removal from aqueous solution. *Journal of Hazardous Materials*, 2017, 332:79-86.
3. Duan S, Ma W, Pan Y, et al. Synthesis of magnetic biochar from iron sludge for the enhancement of Cr (VI) removal from solution. *Journal of the Taiwan Institute of Chemical Engineers*, 2017: S1876107017303516.

4. Yang T, Meng L, Han S, et al. Simultaneous reductive and sorptive removal of Cr(vi) by activated carbon supported  $\beta$ -FeOOH. *RSC Advances*, 7.
5. Shi S, Yang J, Liang S, et al. Enhanced Cr(VI) removal from acidic solutions using biochar modified by  $\text{Fe}_3\text{O}_4@\text{SiO}_2\text{-NH}_2$  particles. *Science of the Total Environment*, 2018, 628–629: 499-508.
6. Zhang X, Lv L, Qin Y, et al. Removal of aqueous Cr(VI) by a magnetic biochar derived from, *Melia azedarach*, wood. *Bioresource Technology*, 2018, 256:1-10.
